# Supplementary material for: New Metabolic Health Definition Might Not Be a Reliable Predictor for Mortality in the Nonobese Chinese Population
Source: Research Square preprint supplement (doi:10.21203/rs.3.rs-1071767/v1), 2021-11-18
Supplement: Supplementary file 1 [file 362e1308b6a207b01aa97432.docx]

**Table S1.** Beta coefficient (standard error) of MH for all variables included in the propensity score model.

| Variables | Changes | Beta | Std. error | p values |
| --- | --- | --- | --- | --- |
| Intercept |  | 21.154 | 1.785 | 0.000 |
| Sex | female vs male | -0.081 | 0.018 | 0.000 |
| Age (years) | increase 1 unit | -0.090 | 0.017 | <0.001 |
| Smoking |  |  |  |  |
| never |  | ref |  |  |
| previous |  | -0.561 | 0.533 | 0.293 |
| current |  | 0.355 | 0.258 | 0.169 |
| Drinking | yes vs no | -0.242 | 0.280 | 0.387 |
| Exercise | yes vs no | -0.552 | 0.231 | 0.017 |
| CVD | yes vs no | -1.006 | 0.718 | 0.161 |
| DBP (mmHg) | increase 1 unit | -0.201 | 0.014 | 0.000 |
| TC (mmol/L) | increase 1 unit | -0.196 | 2.101 | 0.926 |
| HDL-C (mmol/L) | increase 1 unit | 0.954 | 2.109 | 0.651 |
| TG (mmol/L) | increase 1 unit | -0.098 | 0.971 | 0.920 |
| LDL-C (mmol/L) | increase 1 unit | 0.020 | 2.098 | 0.992 |
| BMI (kg/m2) | increase 1 unit | -0.020 | 0.043 | 0.647 |

C-index=0.880, and abbreviations as in table 1.
